# Supplementary material
Source: MDPI journal article supplement (https://www.mdpi.com/2313-0105/8/12/256)
Supplement: s1 [file s1 › batteries-1976712-Supplementary.pdf]

# Supporting information

## Composite cathodes based on lithium-iron phosphate and N-doped carbon materials

Irina Stenina <sup>1\*</sup>, Danis Safikanov <sup>1</sup>, Polina Minakova <sup>1</sup>, Svetlana Novikova <sup>1</sup>, Tatiana Kulova <sup>2</sup>, Andrey Yaroslavtsev <sup>1</sup>

<sup>1</sup> Kurnakov Institute of General and Inorganic Chemistry, Russian Academy of Sciences, Leninsky prospekt 31, Moscow 119991, Russia

<sup>2</sup> Frumkin Institute of Physical Chemistry and Electrochemistry, Russian Academy of Sciences, Leninsky prospekt 31-4, Moscow 119071, Russia

\* Correspondence: stenina@igic.ras.ru, Tel.: +7(495)7756585

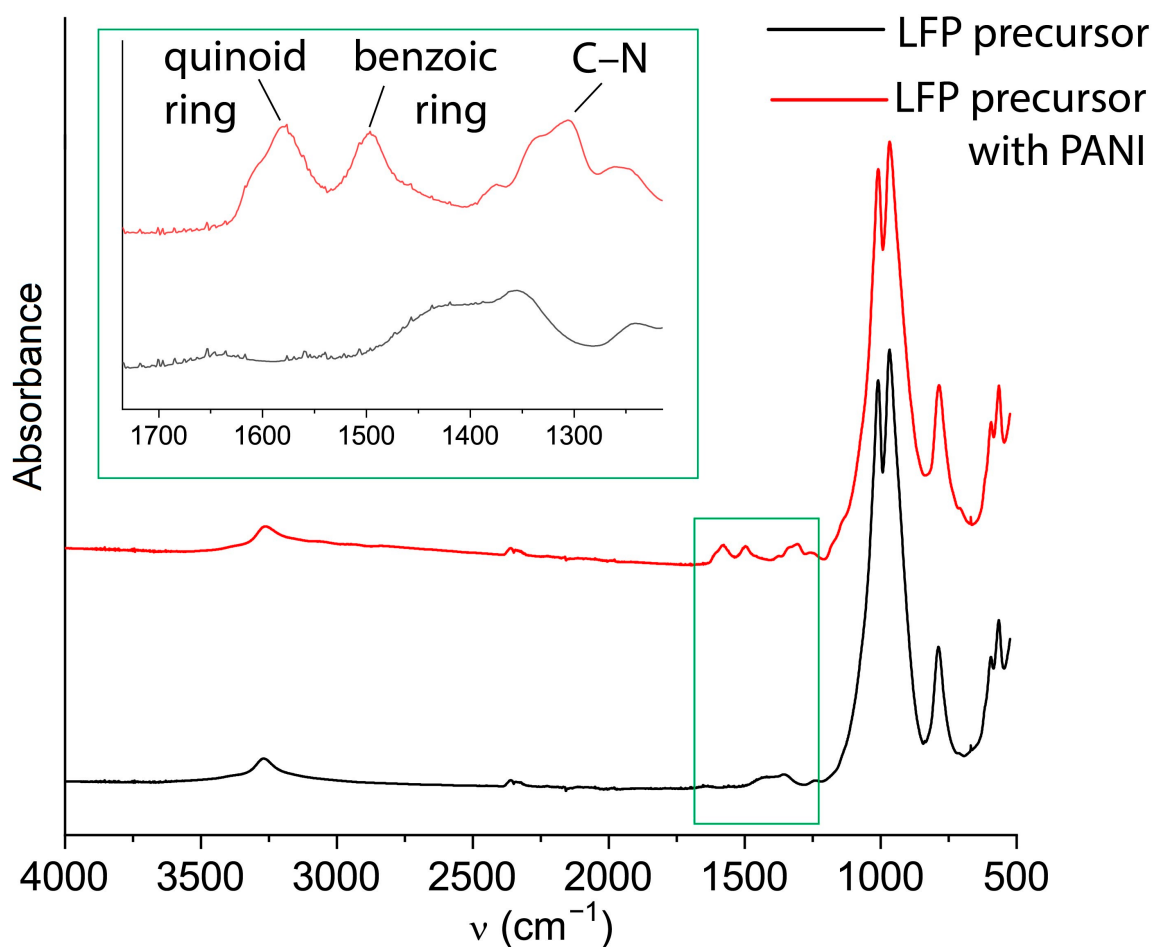

**Figure S1.** FTIR spectra of the pristine LFP precursor and the LFP precursor/PANI composite.

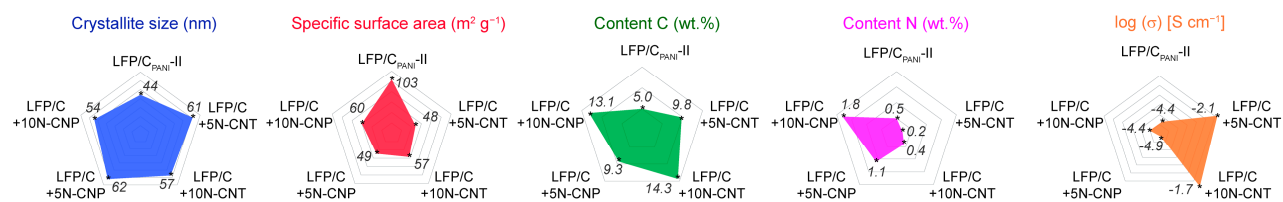

**Figure S2.** The radar charts with the comparison of the crystallite size, contents of carbon and nitrogen, electronic conductivity, and specific surface areas of the prepared composites.

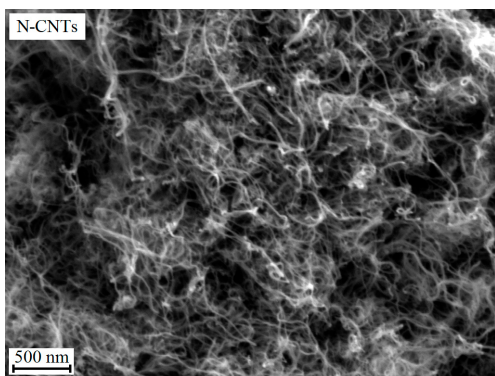

(a)

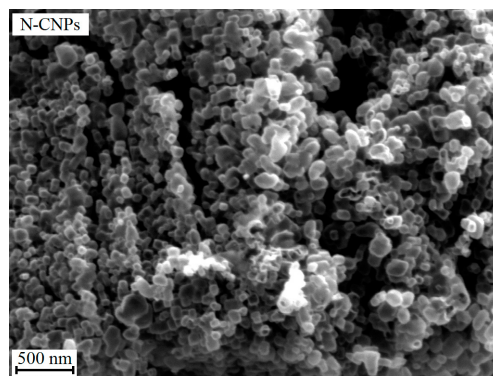

(b)

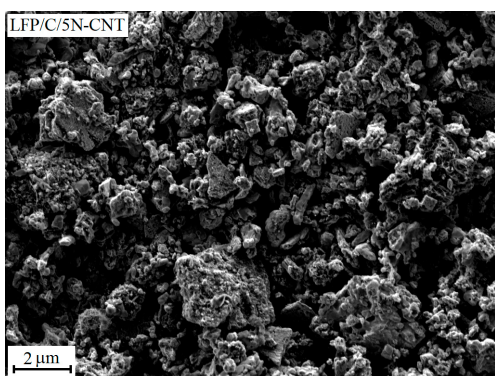

(c)

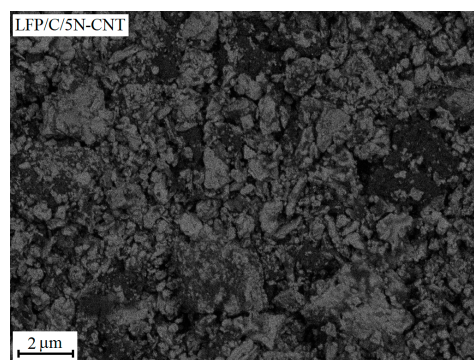

(d)

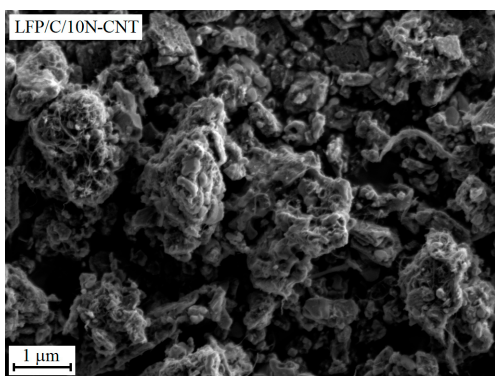

(e)

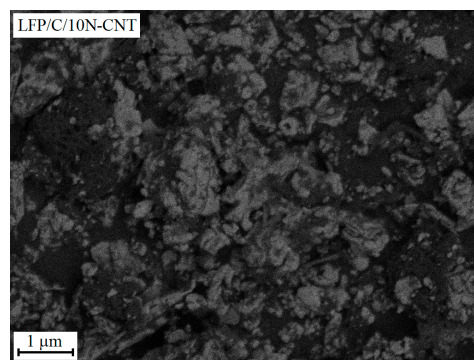

(f)

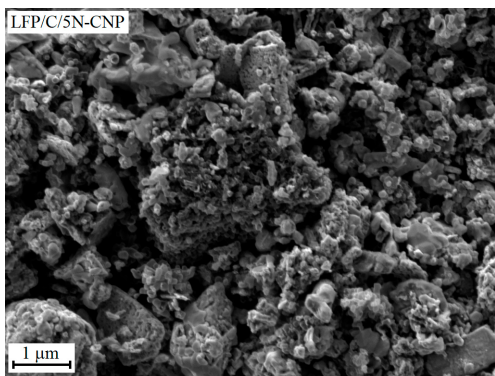

(g)

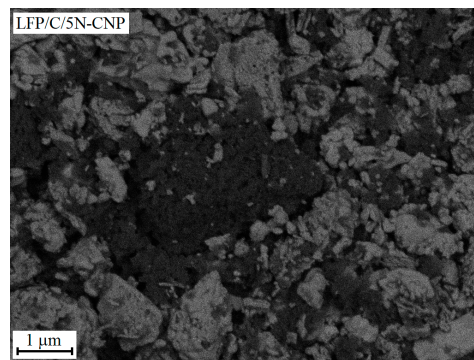

(h)

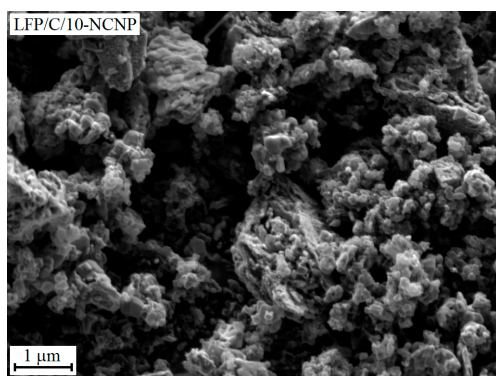

(i)

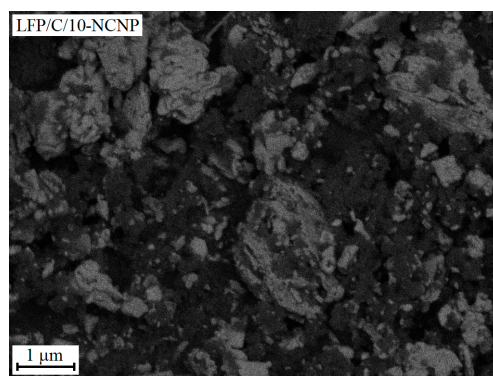

(j)

**Figure S3.** SEM images of N-CNTs (a), N-CNPs (b), the LFP/C/5N-CNT (c, d), the LFP/C/10N-CNT (e, f), LFP/C/5N-CNP (g, h), and LFP/C/10N-CNP (i, j): in secondary (a-c, e, g, i) and backscattered (d, f, h, j) electrons.

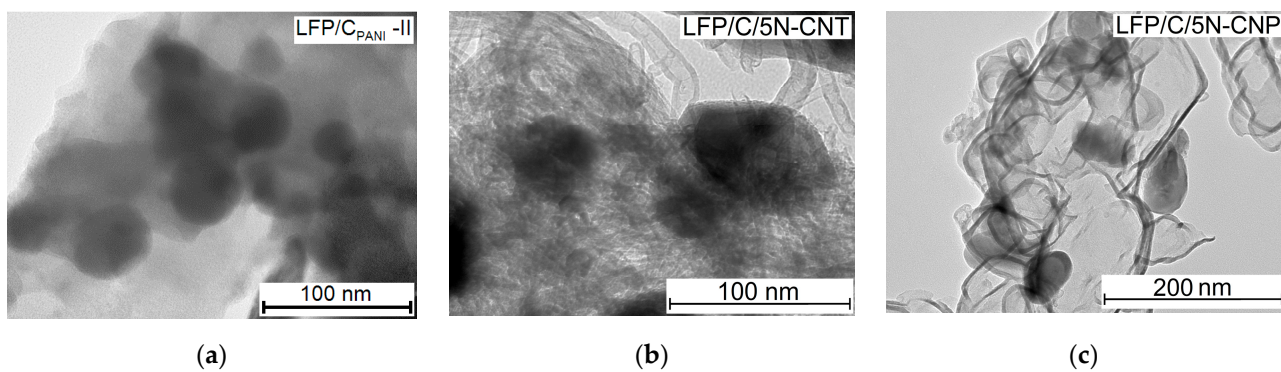

**Figure S4.** TEM images of the LFP/C<sub>PANI</sub>-II (a), LFP/C/5N-CNT (b), LFP/C/5N-CNP (c).
